# Supplementary material for: Western diet-induced shifts in the maternal microbiome are associated with altered microRNA expression in baboon placenta and fetal liver
Source: PubMed Central journal article supplement (PMC10012127; doi:10.3389/fcdhc.2022.945768), 2022-09-08
Supplement: DataSheet_1.pdf [file DataSheet_1.pdf]

*Supplementary Material*

**Western diet-induced maternal microbial dysbiosis is associated with steatosis and altered expression of microRNAs in baboon fetal liver and placenta**

Kameron Y. Sugino<sup>1,†</sup>, Ashok Mandala<sup>1,†</sup>, Rachel C. Janssen<sup>1</sup>, Sunam Gurung<sup>2</sup>, MaJoi Trammell<sup>3</sup>, Michael W. Day<sup>3</sup>, Richard S. Brush<sup>4</sup>, James F. Papin<sup>5</sup>, David W. Dyer<sup>3</sup>, Martin-Paul Agbaga<sup>4,6</sup>, Jacob E. Friedman<sup>1,7</sup>, Marisol Castillo-Castrejon<sup>7,8</sup>, Karen R. Jonscher<sup>1,9,\*</sup> and Dean A. Myers<sup>2</sup>

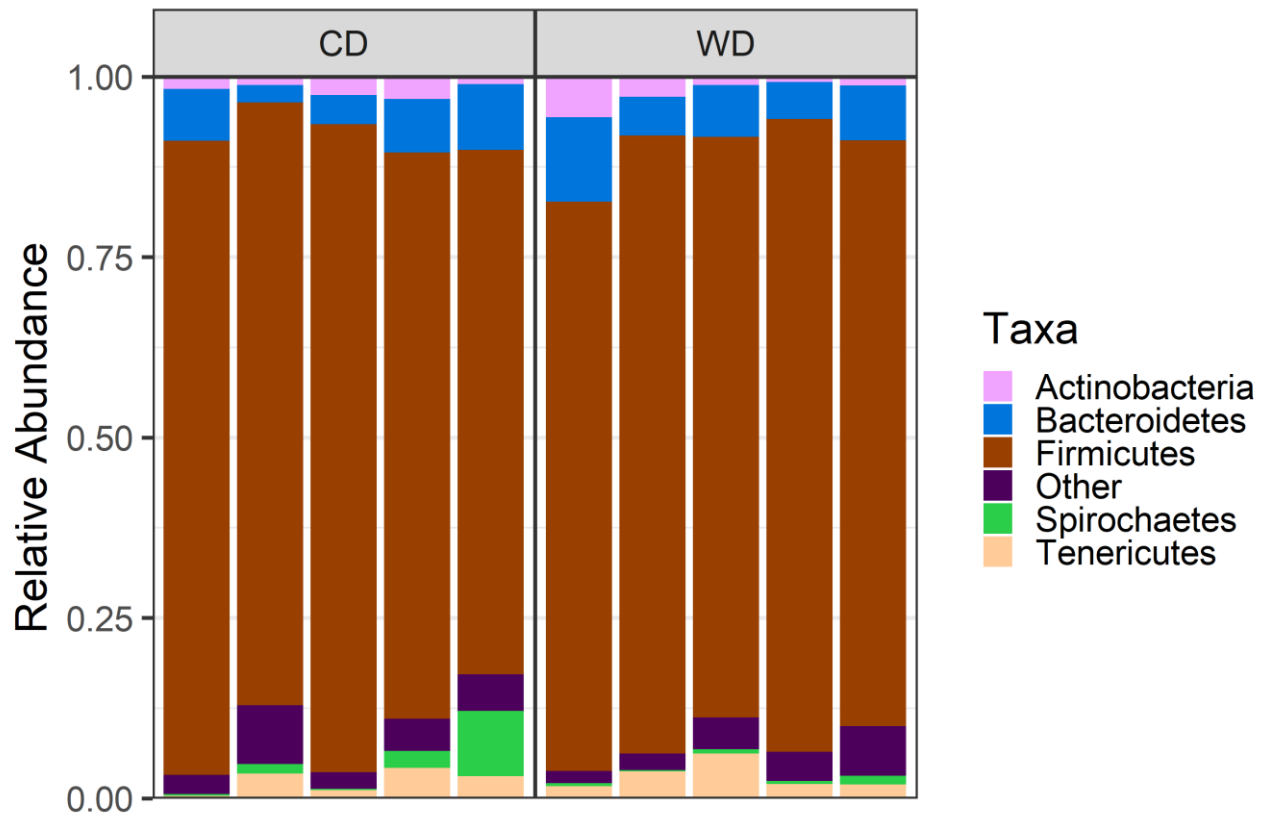

**Supplementary Figure S1.** Microbial abundances of the top five most abundant phyla for each feces sample. The 15 lower abundant phyla are displayed as “Other”.

**Supplemental Table S1.** qPCR primer sequences for mRNA expression.

| <b>Gene</b>            | <b>Forward Primer</b>    | <b>Reverse Primer</b>   |
|------------------------|--------------------------|-------------------------|
| <i>ACACA</i>           | AGCCCTCAACAAAGTCCTCG     | AGTGGGTCACCCCATTGTTG    |
| <i>ACTA2</i>           | GGCAAGTGATCACCATCGGA     | GTGGTTTCATGGATGCCTGC    |
| <i>ACTB</i>            | GGGAAATCGTGCGTGACATT     | AGGTAGTTTCGTGGATGCCA    |
| <i>CCR2</i>            | TTGACGTGAAGCAAATCGGG     | CCAGCATGTTGCCACAAAA     |
| <i>COL1A1</i>          | AAGGACAAGAGGCACGTCTG     | CAGGAAGGTCAGCTGGATGG    |
| <i>COL3A1</i>          | GGTCCAAAGGGTGACAAGGG     | GGCCAGGAGGACCAATAGGA    |
| <i>FAP</i>             | AGTTTCAGCGACTACGCCAA     | TCTTGATCAGTGCGTCCGTC    |
| <i>FASN</i>            | GAGCACAACAGGGTGCTAGA     | TTGATGATCAGGTCCACGGC    |
| <i>HMOX1</i>           | AGCAACAAAGCGCAAGACTC     | GATCCATCGGAGAAGCGGAG    |
| <i>ICAM1</i>           | CAGTTCGTGCTGAAAGCCAC     | ATCGGGGTCCATACAGGACA    |
| <i>IL10</i>            | CTGAGAACCACGACCCAGAC     | GAAGAAATCGATGACAGCGCC   |
| <i>IL12B</i>           | GCAGCTGGTCATCTCTTGGT     | CACCATTCTCCAGGGGCAT     |
| <i>IL1B</i>            | GCTCTCCACCTCCAGGGACAGG   | TGAGGCCCAAGGCCACAGGT    |
| <i>IL1B</i> *          | TGAAAGCTCTCCACCTCCAG     | TTGGGCAGACTCGAATTCCA    |
| <i>IL6</i>             | CAGTTCCTGCAGAAAAAGGCAA   | GAGATGCGTCGTCATGTCCT    |
| <i>IL6</i> *           | ATGCAATAACCACCCCTGAA     | CTGCAGCCACTGGTTCTGT     |
| <i>IL8</i> *           | CCTTTCACCCCAAATTTATC     | TTCTGTATTGACGCAGTGTGG   |
| <i>MCPI (CCL2)</i>     | TTCTGTGCCTGCTGCTCATAG    | GGGGGCATTGATTGCATCTGG   |
| <i>NCF4</i>            | ATACCTGCCCTCAACGCCTA     | CGGGGACACACTCTTGACTT    |
| <i>NFE2L2 (NRF2)</i>   | TCTGCCAACTACTCCCAGGT     | AACGTAGCCGAAGAAACCTCA   |
| <i>NOS2</i>            | AAGACCAGGCTGTCGTTGAG     | GGATTCTGCAGCTGAGTGGT    |
| <i>PDGFA</i>           | AAGCAGCCAACCAGATGTGA     | AGACCCGCACACTGGCAATAA   |
| <i>RPS9</i>            | TTGAAGCTGATCGGCGAGTAT    | TTCATCAAGCGTCAGCAGTT    |
| <i>SREBF1 (SREBP1)</i> | GGATTGCACGTTCTGAAGACAT   | AGAGAGGAGCTCAGTGTGGT    |
| <i>TGFB1</i>           | GAGCCCTGGACACCAACTAC     | GAGGTCCTTGCGGAAGTCAA    |
| <i>TLR4</i>            | GCTTCCTCCGTTTTCCAGAACTGC | TGGAGAGGTGGCTTAGGCTCTGA |
| <i>TNF</i>             | TCGAACCCCAAGTGACAAGCCT   | GCCATTGGCCAGGAGGGCAT    |
| <i>TNF</i> *           | TTCAGCTGGAGAAGGGTGAT     | CCAAAGTAGACCTGCCCAGA    |
| <i>TNFSF12</i>         | CAGGACCCATCGGAACTGAA     | CCGTGTTTTCCGGCCTTTAG    |
| <i>TREM2</i>           | ATCTACAACCCACGATGCG      | CAGAGATCTCCAGCATCCCG    |
| <i>VCAM1</i>           | TTTTTGTC AATGTTGCCCC     | CAGGCTGTAGCTCCCCATTAG   |
| <i>VEGFA</i>           | CCCACTGAGGAGTCCAACAT     | CTCCTATGTGCTGGCCTTGG    |

\* Denotes qPCR primer set used in placental tissue.

**Supplemental Table S2.** Differential expression levels of inflammatory genes in fetal liver.

| Gene         | Fold change | P value | Comment                    |
|--------------|-------------|---------|----------------------------|
| <i>TNF</i>   |             |         | Undetectable amplification |
| <i>CCL2</i>  | 1.090       | 0.707   |                            |
| <i>TLR4</i>  | 0.888       | 0.630   |                            |
| <i>NOS2</i>  |             |         | Undetectable amplification |
| <i>IL10</i>  | 1.391       | 0.486   |                            |
| <i>TGFBI</i> | 1.228       | 0.451   |                            |
| <i>PDGFA</i> | 1.240       | 0.364   |                            |
| <i>IL12B</i> | 1.156       | 0.733   |                            |

**Supplementary Table S3.** Tests of the *Firmicutes/Bacteroidetes* ratio with diet group and maternal parameters.

| Variable                    | Value    | P value |
|-----------------------------|----------|---------|
| Diet group*                 | 15       | 0.6905  |
| Body weight                 | 0.43030  | 0.2145  |
| SSF                         | 0.24316  | 0.4984  |
| CRP                         | -0.33333 | 0.3807  |
| Triglycerides               | -0.11667 | 0.7650  |
| Fasting glucose             | 0.53333  | 0.1392  |
| Fasting insulin             | -0.35758 | 0.3104  |
| HDL                         | -0.40606 | 0.2443  |
| LDL/VLDL                    | -0.24268 | 0.5292  |
| Days gestation              | 0.16035  | 0.6803  |
| Maternal weight at delivery | 0.53333  | 0.1392  |
| Placental weight            | 0.22893  | 0.5855  |

Variables analyzed by Spearman's correlation and rho value shown (excluding diet group).

\*Association analyzed by Wilcoxon rank sum test.

CRP, C-reactive protein; SSF, sum of skin folds.
